# Supplementary material for: Stromal Fibroblasts Drive Host Inflammatory Responses That Are Dependent on Chlamydia trachomatis Strain Type and Likely Influence Disease Outcomes
Source: PubMed Central journal article supplement (PMC6426598; doi:10.1128/mbio.00225-19), 2019-03-19
Supplement: mBio.00225-19-st001.pdf [file mBio.00225-19-st001.pdf]

**Table S1.** Patient sources of primary cells and cell population characteristics used in designated figures.

| Primary cell type | Patient # | Gender, age in years | Cell Composition                                   | Fig 1 | Fig 2 | Fig 3 | Fig 4 | Fig 5 | Fig 6 | Fig 7 | Fig S1 | Fig S2 | Fig S3 | Fig S4 | Fig S5 |
|-------------------|-----------|----------------------|----------------------------------------------------|-------|-------|-------|-------|-------|-------|-------|--------|--------|--------|--------|--------|
| CjE               | 1         | M, 42                | 28% goblet; 69% stratified squamous; 3% fibroblast | X     |       | X     | X     |       | X     |       |        | X      | X      |        |        |
|                   | 2         | M, 56                | 85% goblet; 13% stratified; 2% fibroblast          | X     |       | X     |       |       | X     |       |        | X      |        | X      |        |
|                   | 3         | M, 60                | 86% goblet; 4% stratified; 10% fibroblast          | X     |       |       | X     |       | X     |       |        | X      |        |        |        |
|                   | 4         | M, 61                | 86% goblet; 14% stratified; 0% fibroblast          |       | X     |       |       |       |       |       | X      |        |        |        |        |
|                   | 5         | M, 74                | 89% goblet; 9% stratified; 2% fibroblast           |       |       |       |       |       |       |       |        |        |        |        | X      |
|                   | 6         | F, 54                | 7% goblet; 1% stratified; 92% fibroblast           | X     |       |       | X     |       |       |       |        | X      |        |        |        |
|                   | 7         | F, 80                | 42% goblet; 56% stratified; 2% fibroblast          | X     |       | X     |       |       | X     |       |        | X      |        |        |        |
| CjS               | 1         | M, 42                | 100% fibroblast                                    | X     |       |       |       |       | X     |       |        |        | X      | X      |        |
|                   | 2         | M, 56                | 100% fibroblast                                    | X     |       | X     | X     |       |       |       |        | X      |        |        |        |
|                   | 3         | M, 60                | 100% fibroblast                                    |       |       | X     |       |       |       |       |        | X      |        |        |        |
|                   | 5         | M, 74                | 100% fibroblast                                    | X     | X     | X     | X     |       | X     | X     | X      | X      |        |        |        |
|                   | 6         | F, 54                | 100% fibroblast                                    |       |       |       | X     |       |       |       |        | X      |        |        |        |
|                   | 7         | F, 80                | 100% fibroblast                                    | X     |       |       |       |       | X     |       |        |        |        |        | X      |

|     |    |        |                                |   |   |   |   |   |   |   |   |   |   |   |   |
|-----|----|--------|--------------------------------|---|---|---|---|---|---|---|---|---|---|---|---|
|     | 8  | F, 56  | 100% fibroblast                |   |   |   |   |   | X |   |   |   |   |   |   |
| EcE | 9  | F, <50 | 95% epithelial; 5% fibroblast  | X |   | X |   |   | X |   |   | X | X |   |   |
|     | 10 | F, <50 | 41% epithelial; 59% fibroblast | X |   |   |   |   |   |   |   |   |   |   |   |
|     | 11 | F, <50 | 55% epithelial; 45% fibroblast | X |   |   | X |   | X |   |   | X |   |   |   |
|     | 12 | F, <50 | 61% epithelial; 39% fibroblast | X |   |   | X |   | X |   |   | X |   |   |   |
|     | 13 | F, <50 | 100% epithelial                |   |   | X |   |   |   |   |   | X |   |   | X |
|     | 14 | F, <50 | 100% epithelial                |   | X | X | X |   | X |   | X | X |   | X |   |
| EcS | 9  | F, <50 | 100% fibroblast                |   |   |   |   |   | X |   |   |   | X |   |   |
|     | 10 | F, <50 | 100% fibroblast                | X |   | X | X |   | X |   |   | X |   |   |   |
|     | 12 | F, <50 | 100% fibroblast                | X |   |   | X | X | X |   |   | X |   |   |   |
|     | 13 | F, <50 | 100% fibroblast                | X | X | X | X |   |   |   | X | X |   |   | X |
|     | 14 | F, <50 | 100% fibroblast                | X |   | X | X |   | X |   |   | X |   | X |   |
|     | 15 | F, <50 | 100% fibroblast                |   |   |   |   |   |   |   |   | X |   |   |   |
| EmS | 10 | F, <50 | 100% fibroblast                | X |   |   |   |   |   |   |   | X |   |   |   |
|     | 12 | F, <50 | 100% fibroblast                | X |   |   | X | X | X |   |   | X |   |   |   |
|     | 13 | F, <50 | 100% fibroblast                |   |   |   |   |   | X |   |   |   |   |   | X |
|     | 14 | F, <50 | 100% fibroblast                | X | X |   | X |   | X |   | X |   |   | X |   |
|     | 15 | F, <50 | 100% fibroblast                |   |   | X |   |   |   |   |   | X |   |   |   |
|     | 16 | F, <50 | 100% fibroblast                | X |   | X | X |   |   |   |   | X |   |   |   |
|     | 17 | F, <50 | 100% fibroblast                | X |   | X | X |   | X |   |   | X | X |   |   |
|     | 18 | F, <50 | 100% fibroblast                |   |   |   |   |   |   | X |   |   |   |   |   |
