# Supplementary material for: Stromal Fibroblasts Drive Host Inflammatory Responses That Are Dependent on Chlamydia trachomatis Strain Type and Likely Influence Disease Outcomes
Source: mBio. 2019 Mar 19;10(2):e00225-19. doi: 10.1128/mBio.00225-19 (PMC6426598; doi:10.1128/mBio.00225-19)
Supplement: TABLE S2 [file mBio.00225-19-st002.pdf]

**Supplemental Table 2.** Analytes that were up- or down-regulated in response to *Ct* compared to mock-infected primary cells (data taken from **Figure 4**).

[illegible]
